1 Whole genome comparisons of *Staphylococcus agnetis* isolates from cattle and chickens.

2

3 Abdulkarim Shwani,<sup>a</sup> Pamela R. F. Adkins,<sup>b</sup> Nnamdi S. Ekesi,<sup>a</sup> Adnan Alrubaye,<sup>a</sup> Michael J.

4 Calcutt,<sup>c</sup> John R. Middleton,<sup>b</sup> Douglas D. Rhoads<sup>a,#</sup>

5 <sup>a</sup>Cell and Molecular Biology program, University of Arkansas, Fayetteville, Arkansas, USA

6 <sup>b</sup>Dept. of Veterinary Medicine and Surgery, University of Missouri, Columbia, Missouri, USA

7 <sup>c</sup>Dept. of Veterinary Pathobiology, University of Missouri, Columbia, Missouri, USA

8

9 Running Head: *S. agnetis* phylogenomics

10

11 #Address correspondence to Douglas Rhoads, drhoads@uark.edu

12 Keywords: Staphylococcus, Broiler, Mastitis, Lameness, Phylogeny

13

## 14 **Abstract**

15 *S. agnetis* has been previously associated with subclinical or clinically mild cases of mastitis in

16 dairy cattle and is one of several Staphylococcal species that have been isolated from the bone

17 and blood of lame broilers. We were the first to report that *S. agnetis* could be obtained

18 frequently from bacterial chondronecrosis with osteomyelitis (BCO) lesions of lame broilers.

19 Further, we showed that a particular isolate of *S. agnetis*, chicken isolate 908, can induce

20 lameness in over 50% of exposed chickens, far exceeding normal BCO incidences in broiler

21 operations. We have previously reported the assembly and annotation of the genome of isolate

22 908. To better understand the relationship between dairy cattle and broiler isolates, we

23 assembled 11 additional genomes for *S. agnetis* isolates, including an additional chicken BCO

24 strain, and ten isolates from milk, mammary gland secretions or udder skin, from the collection  
25 at the University of Missouri. To trace phylogenetic relationships, we constructed phylogenetic  
26 trees based on multi-locus sequence typing, and Genome-to-Genome Distance Comparisons.  
27 Chicken isolate 908 clustered with two of the cattle isolates along with three isolates from  
28 chickens in Denmark and an isolate of *S. agnetis* we isolated from a BCO lesion on a commercial  
29 broiler farm in Arkansas. We used a number of BLAST tools to compare the chicken isolates to  
30 those from cattle and identified 98 coding sequences distinguishing isolate 908 from the cattle  
31 isolates. None of the identified genes explain the differences in host or tissue tropism. These  
32 analyses are critical to understanding how Staphylococci colonize and infect different hosts and  
33 potentially how they can transition to alternative niches (bone vs dermis).

#### 34 **Importance**

35 *Staphylococcus agnetis* has been recently recognized as associated with disease in dairy cattle  
36 and meat type chickens. The infections appear to be limited in cattle and systemic in broilers.  
37 This report details the molecular relationships between cattle and chicken isolates in order to  
38 understand how this recently recognized species infects different hosts with different disease  
39 manifestations. The data show the chicken and cattle isolates are very closely related but the  
40 chicken isolates all cluster together suggesting a single jump from cattle to chickens.

#### 41 **Introduction**

42 In the US, skeletal problems are estimated to cost the broiler industry more than 100 million  
43 dollars annually (1-5). Lameness is an important chicken industry issue affecting from 1-10% of  
44 a flock, and a wide array of bacterial genera have been isolated from chickens affected by  
45 bacterial chondronecrosis with osteomyelitis (BCO) (5-25). *Staphylococcus agnetis*, a coagulase-  
46 variable, Gram-positive bacterium has been found to cause infections of the bones and blood of

47 broilers leading to BCO (26, 27). BCO primarily affects the growth plate in the proximal femur  
48 and tibia, the fast-growing leg bones. We have shown that an isolate of *S. agnetis* (strain 908)  
49 obtained from BCO chickens can induce BCO lameness at levels greater than 50% of the  
50 population when administered in a single dose in drinking water (26, 27). Previously, *S. agnetis*  
51 has also been associated with subclinical or mild cases of clinical mastitis in dairy cattle (28-31).  
52 There are very few reports of *S. agnetis* in poultry and we have speculated that the virulent strain  
53 we isolated may be the result of prolonged selection resulting from years of inducing BCO  
54 lameness at our research farm. Genome sequence analysis of multiple isolates of *S. agnetis* from  
55 the University of Arkansas research farm have revealed little sequence variation and thus they  
56 appear to be clonal (unpublished data). The annotated complete genome of strain 908 has been  
57 published (26). Draft genomes of a cattle isolate, *S. agnetis* CBMRN20813338 (32), and chicken  
58 isolates (33) have been deposited in the NCBI genome databases. To better understand the  
59 phylogenomic relationships between dairy cattle and broiler isolates, we have generated genome  
60 assemblies for multiple cattle isolates and an additional chicken isolate of *S. agnetis*. We used  
61 multi-locus sequence typing (MLST) and genome distance comparisons to develop phylogenetic  
62 trees. We also performed reciprocal BLAST and BLASTX comparisons to identify genes and  
63 gene islands that distinguish the chicken and cattle isolates. The goal was to determine the  
64 phylogenetic relationships between cattle and chicken isolates, and whether there were easily  
65 discernable genes responsible for the virulence of isolate 908, or species-specific pathogenesis.

## 66 **Results.**

### 67 ***Staphylococcus agnetis* genomes assemblies.**

68 Sources (host, tissue, disease) for the *S. agnetis* isolates used in our analyses are presented in  
69 Table 1. For this work, we generated draft genomes for eight cattle isolates (1383, 1384, 1385,

70 1387, 1389, 1390, 1391, 1392) from 2x251 paired end MiSeq reads (Table S1), and we generated  
71 one finished genome for one cattle isolate (1379). These cattle isolates were cultured from skin  
72 swabs (1385, 1389), milk (1379, 1383, 1384, 1387, 1391, 1392), or pre-partum mammary gland  
73 secretions (1390). The new, draft, *de novo* assemblies for the eight cattle isolates ranged from 43  
74 to 328 contigs comprising 2.381 to 2.581 Mbp (Table S1). The hybrid assembly from long and  
75 short reads (see Materials and Methods for details) for cattle isolate 1379 produced a single  
76 chromosome of 2.45 Mbp. We identified *S. agnetis* isolate 1416 from a BCO lesion in a  
77 necropsy sampling of BCO birds on a commercial broiler farm in Arkansas. The hybrid  
78 assembly of the 1416 genome produced a 2.45 Mbp chromosome and plasmids of 59 and 28 kbp.  
79 We included the draft genome for cattle isolate CBMRN20813338 as it was the first *S. agnetis*  
80 genome characterized (32). We had earlier published the finished genome for chicken isolate *S.*  
81 *agnetis* 908, a *de novo* assembly of Pacific Biosciences long reads, with subsequent correction  
82 with MiSeq reads (26). This assembly includes a single 2.47 Mbp chromosome and a 29 kbp  
83 plasmid. Recently, we identified two additional plasmids of 3.0 and 2.2 kbp (unpublished) from  
84 the assembly data that we have included in our genome comparisons.

85 **Phylogenetic analyses.** To begin to trace the phylogenomic relationship between the cattle *S.*  
86 *agnetis* isolates and those from chicken, we first generated MLST phylogenetic trees. We  
87 included a total of 13 isolates, including the published genome for cattle isolate *S. agnetis*  
88 CBMRN20813338, the 9 new cattle isolate assemblies, chicken isolates 908 and 1416, and *S.*  
89 *agnetis* isolate 12B from NCBI. We included the genome from strain 12B, isolated from the  
90 milk of a buffalo with bubaline mastitis. The dendrogram from genome BLAST on the NCBI  
91 genome page for *S. agnetis*, presents 12B as the closest genome for a bovine isolate to the  
92 genome for chicken isolate 908. *S. hyicus* ATCC11249<sup>T</sup> (34) from swine exudative dermatitis

93 was used as the outgroup. Figure 1 presents a tree based on seven housekeeping genes (*ackA*,  
94 *fdhD*, *fdhF*, *grol*, *purA*, *tpiA*, *tuf*), where orthologs could be identified in each of the assemblies,  
95 and the genes are dispersed throughout the 908 chromosome. From the MLST phylogenetic tree,  
96 we see two chicken isolates (908 and 1416) cluster within the cattle *S. agnetis* isolates within a  
97 clade with bovine isolates 1379, 1387 and 12B. MLST analysis with seven virulence genes  
98 (encoding five distinct fibronectin binding proteins and two exotoxins) identified in all of the  
99 assemblies produced a tree with a very similar topology (data not shown).

100 Since we began our analyses, additional genomes for isolates of *S. agnetis* have been deposited  
101 in NCBI. The NCBI dendrogram based on genomic BLASTN  
102 (<https://www.ncbi.nlm.nih.gov/genome/?term=agnetis>) for 26 *S. agnetis* assemblies, indicates  
103 that our 908 chicken isolate clusters with three Danish chicken isolates and 5 bovine isolates  
104 (12B, SUNC\_2265, SNUC\_4805, SNUC\_5151, SUC\_3261) in a single clade relative to  
105 CBMRN20813338, and 16 additional bovine isolates. In order to expand on the MLST analyses  
106 and all 36 genomes (26 in NCBI and our 10 new assemblies, including 9 isolates of bovine origin  
107 and 1 isolate of chicken origin) we used the Genome-to-Genome Distance Calculator (GGDC) to  
108 generate a phylogenetic tree based on genetic distances computed from whole genome BLASTN  
109 comparisons (35). This included our two chicken isolates (908, 1416) and three chicken isolates  
110 (NEDS, NEFX, NDYM) from organs from two deceased broilers on a farm in Denmark (33).

111 The phylogenetic tree based on genome distances (Fig. 2) shows that four of the genomes from  
112 chicken isolates (908, NEDS, NEFX, NDYM) cluster within the cattle isolates with the Denmark  
113 chicken isolates being most similar to our chicken isolate 908. Chicken isolate 1416 is in a sister  
114 branch clustered with 7 bovine isolates including isolate 12B from the milk of a buffalo in  
115 Argentina with mastitis. The data are consistent with five, or potentially six, different clades

116 within the *S. agnetis* species group with the five chicken isolate genomes all within one clade.  
117 The nine new genomes for mastitis-related isolates of *S. agnetis* from the USA are distributed  
118 across all branches of the tree. There is no indication of geographic restriction of particular  
119 genotypes for *S. agnetis* isolated from the bovine mammary gland. Nor is there a particularly  
120 noticeable separation of the chicken isolate genomes from the cattle isolate genomes. We also  
121 analyzed all of the genomes by Average Nucleotide Identity (36) and obtained the same  
122 phylogenomic architecture (data not shown).

123 **Genome Comparison.** We used CGView Server (37) to perform and visualize comparisons of  
124 the 2.47 Mbp chromosome from chicken isolate 908 to three cattle isolate genomes; the finished  
125 1379 isolate genome and draft genomes for isolates 1387 and 1385 (Fig. 3). We selected the  
126 1379 isolate genome for production of a finished genome based on being one of the closest  
127 genomes to the chicken isolates (Fig. 2). We included the draft 1387 isolate genome from the  
128 same branch as the chicken isolates, and 1385 as the largest assembly of the other cattle isolates.  
129 The CGView in Figure 3 identified five gene islands which appear to distinguish chicken isolate  
130 908, from the three cattle isolates. The five islands were also visible when we compared chicken  
131 isolate 908 to our other new draft cattle assemblies or the buffalo isolate 12B (data not shown).  
132 We hypothesized that these islands could potentially contain sequences related to host  
133 adaptation. We annotated the genes in these five islands using BLASTP and further evaluated for  
134 presence in the other four chicken isolate genomes, or any of the currently available 36 bovine  
135 isolate genomes (Table S2). Regions in the 908 genome not represented in the cattle isolates  
136 according to the CGView are located approximately as follows: island 1 for 167-235 kbp; island  
137 2 for 978-1021 kbp; island 3 for 1162-1177 kbp ; island 4 for 1831-1848 kbp; and island 5 for

138 2007-2018 kbp. Thus, approximately 154 kbp out of 2474 kbp are distinct from the cattle  
139 isolates.

140 Analysis of the 908 2.47 Mbp chromosome for prophage using the PHASTER website (data not  
141 shown) identifies island 1 as containing two intact Staphylococcal prophage  
142 (Staphy\_EW\_NC\_007056 and Staphy\_IME\_SA4\_NC\_029025) from 170.1 to 232.7 kbp.

143 Islands 2 and 3 are identified as questionable for being complete prophage. Island 2 is  
144 Staphy\_2638A\_NC\_007051 from 980.8 to 1020.9 kbp and island 3 is most similar to a  
145 *Clostridium* phage, phiMMP04\_NC\_019422, from 1156.8 to 1178.5 kbp. Island 4 contains  
146 genes indicative of a conjugative transposon, with sequence similarity to Tn6012 of *S. aureus*,  
147 inserted in an intergenic region approximately 170 bp upstream of the *bioD* gene. The shortest of  
148 the five blocks is island 5 (~11 kbp), which contains an apparent operon encoding a strain  
149 variable Type 1 DNA restriction-modification system (*hsdMSR*). Therefore, 124.4 of the  
150 estimated 154 kbp in the five islands represents prophage sequences, while the other two contain  
151 a probable transposon and a restriction-modification operon. The most similar match to island 4  
152 and 5 in BLAST searches at NCBI were to *S. aureus* genomes. Figure 4 further relates these 5  
153 islands as candidates for host adaptation by comparing the 908 isolate 2.47 Mbp chromosome to  
154 the finished 1379 bovine isolate genome and draft assemblies of chicken isolates NEDS from the  
155 a deceased broiler in Denmark and the finished genome assembly of isolate 1416 from a BCO  
156 broiler on a commercial farm in Arkansas. From these comparisons we conclude that islands 1,  
157 2, 4, and 5 are, for the most part, present in at least one of the other two chicken isolates, but  
158 none of the islands is in both of the other chicken isolates (i.e., specific to all chicken isolates).

159 There is the caveat that the 908 isolate and 1416 isolate genomes are finished genomes and the  
160 NEDS genome is only a draft genome so any island not found in the NEDS assembly could

161 potentially be an assembly issue. Close inspection of the TBLASTN analysis of the proteins  
162 from the islands for presence in any of the bovine isolate genomes (Table S2) 164 of the 908  
163 predicted polypeptides have significant matches in at least one of the cattle isolates, while only  
164 32 are not found in any of the cattle isolates. For those 32 polypeptides, 31 are also not found in  
165 either of the four other chicken isolates (1416 or the three Danish isolates). Polypeptide 217 is  
166 the only polypeptide not identified in any bovine isolate genome but is identified in the 1416  
167 genome. Polypeptide 217 is a 47 amino acid hypothetical protein, so we see no real islands of  
168 polypeptides (i.e., chicken specific pathogenicity island) that distinguish chicken isolate genomes  
169 from the bovine isolate genomes.

170 We have assembled sequences of three plasmids in isolate 908 (29, 3 and 2.2 kbp). None of  
171 these plasmids is found in any of our nine newly assembled cattle isolate listed in Table 1. There  
172 are presently 26 genome assemblies for *S. agnetis* in the NCBI database. Only two assemblies  
173 are listed as “completed” (i.e., finished), our assembly for chicken isolate 908 (26), and isolate  
174 12B from buffalo milk in Argentina (unpublished). The other 24 are draft assemblies. The NCBI  
175 genomes include 21 isolates from cattle, one from buffalo, and four chicken isolates; 908 and the  
176 three chicken isolates from Denmark (NEDS, NEFX, and NDYM). We performed a BLASTN  
177 search using the NCBI program selection “optimize for highly similar sequences (megablast)”  
178 where the query was the three plasmids from isolate 908 plasmids and the database searched was  
179 the 26 assemblies already in NCBI. The 29 kbp plasmid identified one 4729 base contig in the  
180 NEFX assembly with 22% query coverage in 10 different regions, with the largest region  
181 comprising 3317 identities over 3331 bases. The 3 kbp plasmid matched 450 out of 478 bases in  
182 565 bp contigs in all three of the Danish chicken isolate assemblies (NDYM, NEDS, NEFX).  
183 The 2.2 kbp plasmid matched 2071 out of 2080 bases in a 2304 base contig in the chicken NEFX



184 assembly. We also performed BLASTN searches of the three plasmids using the NCBI NR  
185 database exclusive of *S. agnetis* entries. The best matches for the 29 kbp plasmid are to the 30.9  
186 kbp plasmid pH1-1 from a pheasant isolate of *S. aureus*. The two plasmids share 99% identity  
187 with 39% query coverage in three different regions of the plasmid (2520, 1573, and 982 bp).  
188 The 3 kbp 908 plasmid has a 43% query cover with 89% identity with an unnamed 37.2 kbp *S.*  
189 *aureus* plasmid from a human isolate of *S. aureus*. The best match for the 2.2 kbp 908 plasmid  
190 was 99% identity for 2076 bp in a 46.5 kbp plasmid pSALNT46 from an *S. aureus* isolate from  
191 retail turkey meat. We therefore conclude that none of the plasmids in isolate 908 appear to  
192 correspond to a chicken host specialization determinant for the jump from to chickens, but some  
193 sequences in the 29 kbp plasmid and the 2.2 kbp plasmid could have been picked up after the  
194 jump to poultry.

195 To screen at higher resolution, we used the SEED Viewer sequence comparison tool to compare  
196 entire assemblies for individual polypeptide coding sequences for four isolates: chicken isolate  
197 908 (including the 3 plasmids), chicken isolate 1416, bovine isolate 1379 and the bovine  
198 CBMRN isolate. We used isolates 908 and 1416 as finished assemblies of two chicken isolates,  
199 1379 as a finished assembly of a cattle isolate, and CBMRN as the original draft cattle isolate.  
200 The BLASTP comparison results were then filtered for isolate 908 polypeptides with >90%  
201 identity for polypeptides in isolate 1416, but <50% identity for isolate 1379 and the CBMRN  
202 isolate. This filter identified 99 polypeptides (Table S3). To predict functions of these 99  
203 polypeptides we used both the RAST annotation and the NCBI Prokaryote Genome Annotation  
204 Pipeline (PGAP) to categorize the potential function of these 99 polypeptides. We identified 75  
205 polypeptides as hypothetical or of unknown function, 11 phage related, and 8 involved in mobile  
206 elements or plasmid maintenance. The remaining five polypeptides, listed under “other”, are:

207 deoxyuridine 5'-triphosphate nucleotidohydrolase (EC 3.6.1.23), hypothetical SAR0365 homolog  
208 in superantigen-encoding pathogenicity islands SaPI, ribosyl nicotinamide transporter PnuC-like,  
209 aspartate aminotransferase (EC 2.6.1.1), and N-acetyl-L,L-diaminopimelate aminotransferase  
210 (EC 2.6.1.-). If we relaxed the cutoff for the cattle isolates to <70% identity in cattle isolates we  
211 identified 9 additional polypeptides which added one additional hypothetical polypeptide, four  
212 additional phage related polypeptides, and four additional polypeptides involved in mobile  
213 element or plasmid maintenance. There were no additional polypeptides in the “other” category,  
214 only the five described above (Table S3).

215 The dUTP nucleotidohydrolase (Gene ID 209; 191,107-191,625 bp) is annotated as a phage  
216 related protein with roles in viral replication for reducing incorporation of uracil in viral DNA  
217 and is located within the Staphy\_EW\_NC\_007056 prophage in island 1 described above, so this  
218 gene is likely to function primarily in the biology of that prophage.

219 The SAR0365 homolog (Gene ID 1037; 1,018,987-1,020,928 bp) is encoded in island 2 within  
220 the Staphy\_2638A\_NC\_007051 prophage. SAR0365 polypeptide is a hypothetical protein that  
221 the NCBI Prokaryotic Genome Annotation Pipeline annotates as a toxin in the PemK/MazF type  
222 II toxin-antitoxin system. Four of the seven protein entries for SAR0365 homologs in NCBI are  
223 associated with superantigen-encoding pathogenicity islands (SaPI) in clinical isolates of  
224 *Staphylococcus aureus* and two are associated with *S. aureus* phages. Mobilization of SaPI has  
225 been associated with temperate phage replication (38). The 908 isolate genome contains  
226 additional hypothetical genes annotated as SaPI-associated homologs (Gene ID 1184 1,173,209-  
227 1,173,412 bp; Gene ID 1185 1,173,409-1,173,714 bp; Gene ID 1938 1,957,610-1,959,703 bp;  
228 Gene ID 1939 1,959,935-1,961,452 bp; Gene ID 2116 2,136,487-2,136,603 bp). Mobilization  
229 depends on a terminase (38), but the only SaPI associated terminase is Gene ID 2092 (2,118,053-

230 2,118,355 bp). We had previously described a cluster of five exotoxin/superantigen-like proteins  
231 from 1,956,884 to 1,968,958 bp (26). Therefore, the only potential superantigen-containing  
232 pathogenicity island would approximate from 1.95 to 2.12 Mbp which would be larger than the  
233 prototypical 15-18 kbp SaPI (38). A BLASTP of the *S. agnetis* protein database at NCBI with  
234 the predicted protein for Gene ID 1037 (SAR0365 homolog) identified the isolate 908 entry, as  
235 well as identical entries in all three Danish chicken isolates (NEDS, NDYM, NEFX), but no  
236 entries in any of the 20 cattle *S. agnetis* isolates in NCBI. Expanding the BLASTP to all  
237 Staphylococcaceae identified highly similar matches (92% identity, 100% query coverage) in  
238 *Staphylococcus hominis* and less similar (50% identity, 98% query coverage) in *S. aureus*.  
239 Further analyses and additional samples would be required to speculate further regarding the role  
240 of this SAR0365 homolog as a virulence factor in chicken tropism.

241 The genes for ribosyl nicotinamide transporter (Gene ID 2466), aspartate aminotransferase (Gene  
242 ID 2469) and N-acetyl-L,L-diaminopimelate aminotransferase (Gene ID 2470) are located in a  
243 five gene region on the 29 kbp plasmid, with the other 2 genes encoding hypothetical  
244 polypeptides. We performed a BLASTP search of the Staphylococcaceae proteins in the NCBI  
245 database. The 89 amino acid ribosyl nicotinamide transporter matched multiple entries from *S.*  
246 *aureus* and all three Danish *S. agnetis* isolates from chicken. Many of the BLASTP hits for this  
247 polypeptide are annotated as an AbrB family transcriptional regulator by the NCBI Prokaryotic  
248 Genome Annotation Pipeline (PGAP). The 64 amino acid hypothetical polypeptide for Gene ID  
249 2467 is only conserved in two entries from the Danish *S. agnetis* broiler isolates. The 197  
250 residue polypeptide from Gene ID 2468 is well conserved in a broad swath of staphylococci and  
251 PGAP annotates this polypeptide as an IS6 family transposase. We note that Gene ID 2469 and  
252 2470 are close to each other and in different reading frames suggestive of a possible frameshift

253 introduced as an assembly error. Indeed, if we join the predicted polypeptides of these two  
254 ORFs, BLASTP analysis identifies *Staphylooccus* protein entries that match over the span of the  
255 merged polypeptides. However, we have evaluated this hypothesis further by templated  
256 assembly of the 908 MiSeq data onto the 29 kbp plasmid sequence. The MiSeq reads all agree  
257 with the assembly as presented in our NCBI submission. Therefore, these two ORFs in the 29  
258 kbp plasmid may be a frameshifted pseudogene or, if translated may have alternate functions for  
259 this organism.

260 Finally, to determine whether there were any regions in the cattle isolates that are not found in  
261 the chicken isolate genome assemblies, we performed a CGView analysis with the finished  
262 genome from isolate 1379 as the reference (Fig. 5). We included cattle isolate CBMRN and  
263 compared to the finished genomes of chicken isolates 908 (chromosome plus three plasmids),  
264 and 1416. There were cattle isolate regions that appeared to be absent from one of the chicken  
265 isolates but there were no regions found in both cattle isolates that were missing from both  
266 chicken isolates.

## 267 **Discussion.**

268 The Staphylococcal genus not only includes a number of pathogenic species infecting vertebrate  
269 animals worldwide, but also includes many saprophytic or commensal species (39-41). *S. agnetis*  
270 is closely related to *S. hyicus* and *S. chromogenes* and was only described as a distinct  
271 staphylococcal species in 2012, based on DNA sequence differences of rDNA and two protein  
272 coding genes in isolates from mastitis in dairy cattle (42). *S. agnetis* cannot be easily  
273 differentiated from *S. hyicus* using routine speciation techniques, e.g. partial 16S rDNA  
274 sequencing, MALDI-TOF, or fermentation methods (28-30, 43). Hence, *S. agnetis* has either  
275 escaped recognition due to misclassification or is an emerging pathogen in some agricultural

276 animal species. While *S. agnetis* was originally reported in cattle mastitis (42), it has more  
277 recently been reported in chicken bone infections and in multiple internal organs from deceased  
278 broilers (33). Metagenomics also detected *S. agnetis* 16S rDNA sequences in the gut of a sheep  
279 scab mite (44). Phylogenetic analyses based on 16S rRNA sequences cluster *S. agnetis* very  
280 close to *S. hyicus* (26) with a group of staphylococci associated with domestic vertebrate species  
281 (e.g., cattle, swine, dog) (28-31, 34, 45-53). Most of these species are associated with dermal or  
282 epithelial infections, such as exudative dermatitis (28, 29, 31, 34, 47, 49-51, 53-55) and not with  
283 osteomyelitis as we have seen with chicken isolate 908 (26, 27). The more phylogenetically  
284 distant taxon, *S. aureus*, is prominently known for osteomyelitis in humans (56-58). The Danish  
285 broiler chicken isolates were from multiple tissues from deceased birds and we have no  
286 information about possible osteomyelitis. That the three Danish *S. agnetis* isolates, and our  
287 isolates 908 and 1416, are all closely related and within a clade of the cattle *S. agnetis* isolates  
288 suggests a recent expansion of the host range (i.e. from cattle to chickens) as seen for a human-  
289 specific clade of *S. aureus* that “jumped” to chickens in the United Kingdom (17). A single  
290 radiation out of the cattle group also argues against *S. agnetis* jumping back and forth between  
291 cattle and chickens. We have previously reported that isolate 908 can produce a bacteremia in  
292 the latter stages of BCO development before the birds are overtly lame (5, 26, 27, 59). We do not  
293 know if the Danish isolates can induce the BCO lameness that we have demonstrated for isolate  
294 908 (26, 27). Our isolate 908 appears to represent a hypervirulent clone expanded through years  
295 of inducing high levels of BCO lameness on our research farm (5, 26, 27, 60-63) and could have  
296 evolved through selection from less virulent *S. agnetis* in broiler populations. Therefore, our  
297 genomic comparisons have been directed towards identification of any gene(s) that *S. agnetis*

298 908 could have acquired that facilitate the switch from involvement in cattle epithelial and  
299 mammary gland colonization and infection, to bone infections in chickens.

300 None of the gene islands (Table S2) or individual genes (Table S3) we identified as  
301 distinguishing isolate 908 from closely related cattle isolates is currently recognizable as a  
302 virulence marker, or that mediates tissue tropism. Previously we had identified 44 virulence  
303 genes in our annotation of the isolate 908 genome (26) and none of these genes is in the regions  
304 distinguishing the chicken and cattle isolates. The genomic analyses of the human-to-chicken  
305 jump for *S. aureus* was associated with acquisition of two prophage, two plasmids, and a  
306 pathogenicity island, the inactivation of several virulence determinants important to human  
307 pathogenesis, and enhanced resistance to chicken neutrophils (17). Thus, we expected to readily  
308 find genes, or gene clusters, in chicken isolates of *S. agnetis* associated with the jump to chickens  
309 from cattle. Most of the distinguishing gene islands in isolate 908 contain genes associated with  
310 mobile elements (prophage), but none are virulence determinants. We have unpublished  
311 evidence that isolate 908 is highly resistant to an immortalized chicken macrophage and are  
312 pursuing the genes for macrophage resistance. Since we have failed to identify unique virulence  
313 genes that distinguish the chicken isolate 908 from the cattle isolates we conclude that the basis  
314 for the jump from cattle to chickens is most likely the result of small alterations (i.e., missense or  
315 regulatory mutations ) in a few virulence-associated factors. Hypervirulence of isolate 908 in  
316 chickens could be from a single amino acid change. Hypervirulence of isolates of *Campylobacter*  
317 *jejuni*, were demonstrated to result from a single substitution in an outer membrane protein,  
318 resulting in induction of spontaneous abortions in sheep (64). Therefore, further fine-level  
319 comparisons or directed genome evolution (64) will be required to dissect how this emerging  
320 pathogen has evolved and diversified from cattle mastitis to chicken bone pathogen.

## 321 **Materials and Methods**

322 **Reference genomes.** Isolate designations and host sources are provided in Table 1 and the  
323 details of the genome assemblies and accessions in NCBI are in Table S1. Chicken isolate 908  
324 was from necrotic femoral lesions, while NDYM, NEDS and NEFX were from tissue samples  
325 from deceased broilers in Denmark. Isolates NDYM and NEDS were from the same broiler.  
326 The cattle isolate CBMRN was isolated from milk of a cow with subclinical mastitis that was  
327 enrolled in the Canadian Bovine Mastitis Research Network (CBMRN) cohort study (32).  
328 ATCC11249 represents the *S. hyicus* type strain isolated from a pig exudative epidermitis  
329 lesion (34).

330 **Bacterial strains.** Genomes for ten *S. agnetis* isolates were newly assembled (Table S1),  
331 including nine cattle isolates, and one chicken isolate. Chicken isolate 1416 was isolated from a  
332 necrotic femoral lesion of a lame bird in a commercial broiler operation in Arkansas. The nine  
333 cattle isolates were from a collection at the University of Missouri. Two isolates were skin  
334 isolates, one isolate was obtained from a pre-partum mammary secretion, and six isolates were  
335 obtained from the milk of cows with subclinical mastitis. All cattle isolates had been previously  
336 identified as *S. agnetis* based on partial DNA sequence of either elongation factor Tu (*tuf*) or 3-  
337 dehydroquinate dehydratase (*aroD*) (30). All isolates were archived at -80 °C in 20-40%  
338 glycerol, maintained on Tryptic Soy Agar slants, and grown in Tryptic Soy Broth (TSB; Difco,  
339 Becton, Dickinson and Company, Franklin Lakes, NJ).

340 **Genome sequencing and assembly.** DNA isolation was based on the method described by Dyer  
341 and Iandolo (65). Isolates were grown to mid log phase in TSB (40 ml) at 37 °C with shaking,  
342 pelleted, and resuspended in 2.5 ml 30 mM TrisCl, 3 mM EDTA, 50 mM NaCl, 50 mM glucose,  
343 pH 7.5. Lysostaphin (Sigma-Aldrich, St. Louis, MO) was added to 20 µg/ml, and incubated at 37



344 °C for 40-60 min. SDS was added to 0.5%, then the lysate was treated with RNaseA (Sigma-  
345 Aldrich) at 20 ug/ul for 30 min at 37 °C, then Pronase E (Sigma-Aldrich) at 20 ug/ul for 30 min  
346 at 37 °C. The lysate was then extracted successively with 50:48:2 phenol:CHCl<sub>3</sub>:isoamyl  
347 alcohol, and 24:1 CHCl<sub>3</sub>:isoamyl alcohol. DNA was then collected by ethanol precipitation.  
348 DNA was quantified by Hoechst 33258 fluorometry in a GloMax®-Multi Jr. (Promega Corp.,  
349 Madison, WI), and DNA integrity verified by agarose gel electrophoresis. Purified DNA from  
350 each isolate was submitted to the Research Technology Support Facility Genomics Core at  
351 Michigan State University for barcoded-library construction, pooled and subjected to 2x251  
352 sequencing on an Illumina MiSeq. For draft genome assemblies the MiSeq reads were assembled  
353 using the *de novo* pipeline in Lasergene NGen ver. 13.0 (DNASTar, Madison, WI). For isolates  
354 1379 and 1416 we produced finished genomes by hybrid assemblies of MiSeq and Oxford  
355 Nanopore MinION long reads. Long reads were either from barcoded or rapid kit libraries  
356 prepared and sequenced on Minion v9.3 flow cells (Oxford Nanopore Technologies, Oxford  
357 Science Park, UK) according to the manufacturer's recommendations. Minion reads were  
358 filtered with a custom script to filter reads for length and average Q-score, prior to assembly.  
359 For isolate 1379, we filtered for length  $\geq 2000$  bases and Qscore  $\geq 13$ . For isolate 1416, we  
360 filtered for length  $\geq 5000$  bases and Qscore  $> 16$ . Nanopore reads and MiSeq reads were  
361 assembled using the Unicycler ver. 0.4.6.0 pipeline on Galaxy (<https://usegalaxy.org>) using the  
362 Bold bridging mode. All assemblies and sequence reads have been deposited in NCBI and the  
363 accession and biosample identifiers are in Table S1.

364 **Genome annotation and phylogenetic comparison.** The assembled genome sequences were  
365 compared with chicken isolate 908 using BLASTN implemented in CGViewer (37) to identify  
366 regions missing in one or more genome. Specific gene regions were annotated using either the



367 BASys server at <http://www.basys.ca> (66) or the Rapid Annotation using System Technology  
368 (RAST) server at <http://rast.nmpdr.org> (67). Unique genes were verified by TBLASTN  
369 comparisons and reciprocal gene-by-gene BLASTP comparisons using the SEED server (68).  
370 Unique genes were further annotated using the KEGG (Kyoto Encyclopedia of Genes and  
371 Genomes) website at <https://www.genome.jp/kegg> (69). Prophage identification was performed  
372 using PHASTER (PHAge Search Tool Enhanced Release) at <http://phaster.ca> (70).  
373 **Phylogenetic Analyses.** For MLST analysis gene coding sequences were aligned and trimmed in  
374 MegAlign (DNASar) then concatenated. Clustal Omega implemented in MegAlignPro  
375 (DNASar) was used to generate phylogenetic trees. Consensus neighbor-joining trees with 2500  
376 bootstrap replications were constructed based on the alignments. Genome-to-Genome Distance  
377 Calculator (GGDC) <http://ggdc.dsmz.de/ggdc.php> (35) was used to generate whole genome  
378 BLAST distance values. These distance calculations were used to generate a phylogenetic tree  
379 using the neighbor-joining method as implemented at <http://trex.uqam.ca>. Trees were rendered  
380 and rerooted in Archeopteryx 0.9901 (71).

### 381 **Acknowledgements**

382 This research was partially supported by grants from the Arkansas Biosciences Institute, Chr  
383 Hansen, Zinpro LLC, and Cobb Vantress, Inc. The funders had no role in the design of this  
384 study, the interpretation of the results, or the contents of this manuscript.

### 385 **Literature Cited**

- 386 1. Whitehead C. 1992. Bone biology and skeletal disorders in poultry. Carfax Publishing  
387 Co.
- 388 2. Sullivan TW. 1994. Skeletal problems in poultry: Estimated annual cost and descriptions.  
389 Poult Sci 73:879-882.

- 390 3. Kestin SC, Su G, Sorensen P. 1999. Different commercial broiler crosses have different  
391 susceptibilities to leg weakness. *Poult Sci* 78:1085-1090.
- 392 4. Kestin SC, Gordon S, Su G, Sorensen P. 2001. Relationship in broiler chickens between  
393 lameness, liveweight, growth rate and age. *Vet Rec* 148:195-197.
- 394 5. Wideman RF. 2016. Bacterial chondronecrosis with osteomyelitis and lameness in  
395 broilers: a review. *Poult Sci* 95 325-344.
- 396 6. Butterworth A. 1999. Infectious components of broiler lameness: a review. . *World*  
397 *Poultry Sci J* 55:327-352.
- 398 7. Duff S. 1990. Do different forms of spondylolisthesis occur in broiler fowls? *Avian*  
399 *Pathol* 19:279-294.
- 400 8. Duff S, Randall C. 1987. Observations on femoral head abnormalities in broilers. *Res Vet*  
401 *Sci* 42:17-23.
- 402 9. Duff SRI. 1990. Diseases of the musculoskeletal system. *In* Jordan F (ed), *Poultry*  
403 *Diseases* 3rd ed. Bailliere, Tindall. UK.
- 404 10. Emslie KR, Nade S. 1983. Acute hematogenous Staphylococcal osteomyelitis: a  
405 description of the natural history in an avian model. *Am J Pathol* 110:333-345.
- 406 11. Griffiths G, Hopkinson W, Lloyd J. 1984. Staphylococcal necrosis of the head of the  
407 femur in broiler chickens. *Aust Vet J* 61:293-293.
- 408 12. Julian RJ. 1985. Osteochondrosis, dyschondroplasia, and osteomyelitis causing femoral  
409 head necrosis in turkeys. *Avian Dis* 29:854-866.
- 410 13. Julian RJ. 2005. Production and growth related disorders and other metabolic diseases of  
411 poultry - A review. *Vet J* 169:350-369.

- 412 14. Kense MJ, Landman WJM. 2011. *Enterococcus cecorum* infections in broiler breeders  
413 and their offspring: Molecular epidemiology. *Avian Pathol* 40:603-612.
- 414 15. Kibenge FS, Wilcox G, Pass D. 1983. Pathogenicity of four strains of *Staphylococci*  
415 isolated from chickens with clinical tenosynovitis. *Avian Pathol* 12:213-220.
- 416 16. Li Y, Chen L, Wu X, Huo S. 2015. Molecular characterization of multidrug-resistant  
417 avian pathogenic *Escherichia coli* isolated from septicemic broilers. *Poult Sci* 94:601-  
418 611.
- 419 17. Lowder BV, Guinane CM, Ben Zakour NL, Weinert LA, Conway-Morris A, Cartwright  
420 RA, Simpson AJ, Rambaut A, Nübel U, Fitzgerald JR. 2009. Recent human-to-poultry  
421 host jump, adaptation, and pandemic spread of *Staphylococcus aureus*. *PNAS USA*  
422 106:19545-19550.
- 423 18. Marek A, Stepień-Pyśniak D, Pyzik E, Adaszek Ł, Wilczyński J, Winiarczyk S. 2016.  
424 Occurrence and characterization of *Staphylococcus* bacteria isolated from poultry in  
425 Western Poland. *Berl tierarztl Wschr* 129:147-152.
- 426 19. McNamee PT, Smyth JA. 2000. Bacterial chondronecrosis with osteomyelitis ('femoral  
427 head necrosis') of broiler chickens: a review. *Avian Pathol* 29:477-495.
- 428 20. Nicoll TR, Jensen MM. 1987. Preliminary studies on bacterial interference of  
429 *Staphylococcus* of chickens. *Avian Dis* 31:140-144.
- 430 21. Packialakshmi B, Rath N, Huff W, Huff G. 2015. Poultry femoral head separation and  
431 necrosis: A review. *Avian Dis* 59:349-354.
- 432 22. Skeeles KJ. 1997. *Staphylococcosis*, p 247-253. In B.W. Calnek, Barnes HJ, Beard CW,  
433 McDougald LR, Saif YM (ed), *Diseases of Poultry* 10 ed. Iowa State University Press,  
434 Ames, IA, USA.

- 435 23. Smeltzer M, Gillaspay A. 2000. Molecular pathogenesis of Staphylococcal osteomyelitis.  
436 Poult Sci 79:1042-1049.
- 437 24. Smith HW. 1954. Experimental Staphylococcal infection in chickens. J Pathol Bacteriol  
438 67:81-87.
- 439 25. Ytrehus B, Carlson C, Ekman S. 2007. Etiology and pathogenesis of osteochondrosis.  
440 Vet Pathol 44:429-448.
- 441 26. Al-Rubaye AAK, Couger MB, Ojha S, Pummill JF, Koon JA, II, Wideman RF, Jr.,  
442 Rhoads DD. 2015. Genome analysis of *Staphylococcus agnetis*, an agent of lameness in  
443 broiler chickens. PLoS ONE 10:e0143336.
- 444 27. Al-Rubaye AAK, Ekesi NS, Zaki S, Emami NK, Wideman RF, Rhoads DD. 2017.  
445 Chondronecrosis with osteomyelitis in broilers: Further defining a bacterial challenge  
446 model using the wire flooring model. Poult Sci 96:332-340.
- 447 28. Adkins PRF, Dufour S, Spain JN, Calcutt MJ, Reilly TJ, Stewart GC, Middleton JR.  
448 2018. Molecular characterization of non-aureus Staphylococcus spp. from heifer  
449 intramammary infections and body sites. J Dairy Sci 101:5388-5403.
- 450 29. Adkins PRF, Dufour S, Spain JN, Calcutt MJ, Reilly TJ, Stewart GC, Middleton JR.  
451 2018. Cross-sectional study to identify staphylococcal species isolated from teat and  
452 inguinal skin of different-aged dairy heifers. J Dairy Sci 101:3213-3225.
- 453 30. Adkins PRF, Middleton JR, Calcutt MJ, Stewart GC, Fox LK. 2017. Species  
454 identification and strain typing of *Staphylococcus agnetis* and *Staphylococcus hyicus*  
455 isolates from bovine milk by use of a novel multiplex PCR assay and pulsed-field gel  
456 electrophoresis. J Clin Microbiol 55:1778-1788.

- 457 31. Åvall-Jääskeläinen S, Taponen S, Kant R, Paulin L, Blom J, Palva A, Koort J. 2018.  
458 Comparative genome analysis of 24 bovine-associated *Staphylococcus* isolates with  
459 special focus on the putative virulence genes. *PeerJ* 6:e4560.
- 460 32. Calcutt MJ, Foecking MF, Fry PR, Hsieh H-Y, Perry J, Stewart GC, Scholl DT, Messier  
461 S, Middleton JR. 2014. Draft genome sequence of bovine mastitis isolate *Staphylococcus*  
462 *agnetis* CBMRN 20813338. *Genome Announc* 2.
- 463 33. Poulsen LL, Thøfner I, Bisgaard M, Olsen RH, Christensen JP, Christensen H. 2017.  
464 *Staphylococcus agnetis*, a potential pathogen in broiler breeders. *Vet Microbiol* 212:1-6.
- 465 34. Calcutt MJ, Foecking MF, Hsieh H-Y, Adkins PRF, Stewart GC, Middleton JR. 2015.  
466 Sequence analysis of *Staphylococcus hyicus* ATCC 11249<sup>T</sup>, an etiological agent of  
467 exudative epidermitis in swine, reveals a type VII secretion system locus and a novel  
468 116-kilobase genomic island harboring toxin-encoding genes. *Genome Announc*  
469 3:e01525-14.
- 470 35. Meier-Kolthoff JP, Auch AF, Klenk H-P, Göker M. 2013. Genome sequence-based  
471 species delimitation with confidence intervals and improved distance functions. *BMC*  
472 *Bioinformatics* 14:60.
- 473 36. Pritchard L, Glover RH, Humphris S, Elphinstone JG, Toth IK. 2016. Genomics and  
474 taxonomy in diagnostics for food security: soft-rotting enterobacterial plant pathogens.  
475 *Anal Methods* 8:12-24.
- 476 37. Grant JR, Stothard P. 2008. The CGView Server: a comparative genomics tool for  
477 circular genomes. *Nucl Acid Res* 36:W181-W184.
- 478 38. Ruzin A, Lindsay J, Novick RP. 2001. Molecular genetics of SaPI1 – a mobile  
479 pathogenicity island in *Staphylococcus aureus*. *Molecular Microbiology* 41:365-377.

- 480 39. Becker K, Heilmann C, Peters G. 2014. Coagulase-negative Staphylococci. Clin  
481 Microbiol Rev 27:870.
- 482 40. Cox HU, Newman SS, Roy AF, Hoskins JD. 1984. Species of Staphylococcus isolated  
483 from animal infections. The Cornell veterinarian 74:124-135.
- 484 41. Mathema B, Mediavilla J, Chen L, Kreiswirth B. 2009. Evolution and taxonomy of  
485 staphylococci, p 31-64. In Crossley K, Jefferson K, Archer G, Folwer V (ed),  
486 Staphylococci in Human Disease, 2nd Edition. John Wiley & Sons, Oxford, UK.
- 487 42. Taponen S, Supré K, Piessens V, Van Coillie E, De Vlieghe S, Koort JMK. 2012.  
488 *Staphylococcus agnetis* sp. nov., a coagulase-variable species from bovine subclinical  
489 and mild clinical mastitis. Int J Syst Evol Microbiol 62:61-65.
- 490 43. Zadoks RN, Middleton JR, McDougall S, Katholm J, Schukken YH. 2011. Molecular  
491 epidemiology of mastitis pathogens of dairy cattle and comparative relevance to humans.  
492 Journal of Mammary Gland Biology and Neoplasia 16:357-372.
- 493 44. Hogg JC, Lehane MJ. 1999. Identification of bacterial species associated with the sheep  
494 scab mite (*Psoroptes ovis*) by using amplified genes coding for 16S rRNA. Appl Environ  
495 Microbiol 65:4227-4229.
- 496 45. Bicart-See A, Rottman M, Cartwright M, Seiler B, Gamini N, Rodas M, Penary M,  
497 Giordano G, Oswald E, Super M, Ingber DE. 2016. Rapid Isolation of *Staphylococcus*  
498 *aureus* Pathogens from Infected Clinical Samples Using Magnetic Beads Coated with Fc-  
499 Mannose Binding Lectin. PLoS ONE 11:e0156287.
- 500 46. Christensen GD, Baddour LM, Simpson WA. 1987. Phenotypic variation of  
501 *Staphylococcus epidermidis* slime production in vitro and in vivo. Infect Immun 55:2870-  
502 2877.

- 503 47. Stepień-Pyśniak D, Marek A, Rzedzicki J. 2009. Occurrence of bacteria of the genus  
504 *Staphylococcus* in table eggs descended from different sources. *Pol J Vet Sci* 12:481-484.
- 505 48. Devriese LA. 1977. Isolation and identification of *Staphylococcus hyicus*. *Am J Vet Res*  
506 38:787-792.
- 507 49. Devriese LA, Hajek V, Oeding P, Meyer SA, Schleifer KH. 1978. *Staphylococcus hyicus*  
508 (Sompolinsky 1953) comb. nov. and *Staphylococcus hyicus* subsp. *chromogenes* subsp.  
509 nov. *Int J Syst Evol Microbiol* 28:482-490.
- 510 50. Devriese LA, Laevens H, Haesebrouck F, Hommez J. 1994. A simple identification  
511 scheme for coagulase negative staphylococci from bovine mastitis. *Res Vet Sci* 57:240-  
512 244.
- 513 51. Foster AP. 2012. Staphylococcal skin disease in livestock. *Vet Dermatol* 23:342-e63.
- 514 52. Tse H, Tsoi HW, Leung SP, Urquhart IJ, Lau SKP, Woo PCY, Yuen KY. 2011.  
515 Complete genome sequence of the veterinary pathogen *Staphylococcus pseudintermedius*  
516 strain HKU10-03, isolated in a case of canine pyoderma. *J Bact* 193:1783-1784.
- 517 53. Zakour NLB, Bannoehr J, van den Broek AHM, Thoday KL, Fitzgerald JR. 2011.  
518 Complete genome sequence of the canine pathogen *Staphylococcus pseudintermedius*. *J*  
519 *Bact* 193:2363-2364.
- 520 54. Le Maréchal C, Seyffert N, Jardin J, Hernandez D, Jan G, Rault L, Azevedo V, François  
521 P, Schrenzel J, van de Guchte M, Even S, Berkova N, Thiéry R, Fitzgerald JR, Vautor E,  
522 Le Loir Y. 2011. Molecular basis of virulence in *Staphylococcus aureus* mastitis. *PLoS*  
523 *ONE* 6:e27354.
- 524 55. Witte W, Hummel R, Meyer W, Exner H, Wundrak R. 1977. Ecology of *Staphylococcus*  
525 *aureus*: Characterization of strains from chicken. *Z Allg Mikrobiol* 17:639-646.

- 526 56. Aanensen DM, Feil EJ, Holden MTG, Dordel J, Yeats CA, Fedosejev A, Goater R,  
527 Castillo-Ramírez S, Corander J, Colijn C, Chlebowicz MA, Schouls L, Heck M, Pluister  
528 G, Ruimy R, Kahlmeter G, Åhman J, Matuschek E, Friedrich AW, Parkhill J, Bentley  
529 SD, Spratt BG, Grundmann H. 2016. Whole-genome sequencing for routine pathogen  
530 surveillance in public health: a population snapshot of invasive *Staphylococcus aureus* in  
531 Europe. mBio 7:e00444-16.
- 532 57. Loughran AJ, Gaddy D, Beenken KE, Meeker DG, Morello R, Zhao H, Byrum SD,  
533 Tackett AJ, Cassat JE, Smeltzer MS. 2016. Impact of **sarA** and phenol-soluble modulins  
534 on the pathogenesis of osteomyelitis in diverse clinical Isolates of *Staphylococcus aureus*.  
535 Infect Immun 84:2586-2594.
- 536 58. Powers ME, Wardenburg JB. 2014. Igniting the fire: *Staphylococcus aureus* virulence  
537 factors in the pathogenesis of sepsis. PLoS Pathog 10:e1003871.
- 538 59. Mandal RK, Jiang T, Al-Rubaye AA, Rhoads DD, Wideman RF, Zhao J, Pevzner I,  
539 Kwon YM. 2016. An investigation into blood microbiota and its potential association  
540 with bacterial chondronecrosis with osteomyelitis (BCO) in broilers. Sci Rep 6:25882.
- 541 60. Wideman RF, Al-Rubaye A, Gilley A, Reynolds D, Lester H, Yoho D, Hughes JM,  
542 Pevzner I. 2013. Susceptibility of 4 commercial broiler crosses to lameness attributable to  
543 bacterial chondronecrosis with osteomyelitis. Poult Sci 92:2311-2325.
- 544 61. Wideman RF, Al-Rubaye A, Kwon YM, Blankenship J, Lester H, Mitchell KN, Pevzner  
545 IY, Lohrmann T, Schleifer J. 2015. Prophylactic administration of a combined prebiotic  
546 and probiotic, or therapeutic administration of enrofloxacin, to reduce the incidence of  
547 bacterial chondronecrosis with osteomyelitis in broilers. Poult Sci 94:25-36.



- 548 62. Wideman RF, Al-Rubaye A, Reynolds D, Yoho D, Lester H, Spencer C, Hughes JD,  
549 Pevzner IY. 2014. Bacterial chondronecrosis with osteomyelitis in broilers: Influence of  
550 sires and straight-run versus sex-separate rearing. *Poult Sci* 93:1675-1687.
- 551 63. Wideman RF, Hamal KR, Stark JM, Blankenship J, Lester H, Mitchell KN, Lorenzoni G,  
552 Pevzner I. 2012. A wire-flooring model for inducing lameness in broilers: Evaluation of  
553 probiotics as a prophylactic treatment. *Poult Sci* 91:870-883.
- 554 64. Wu Z, Periaswamy B, Sahin O, Yaeger M, Plummer P, Zhai W, Shen Z, Dai L, Chen SL,  
555 Zhang Q. 2016. Point mutations in the major outer membrane protein drive  
556 hypervirulence of a rapidly expanding clone of *Campylobacter jejuni*. *PNAS USA*  
557 113:10690-10695.
- 558 65. Dyer DW, Iandolo JJ. 1983. Rapid isolation of DNA from *Staphylococcus aureus*. *Appl*  
559 *Environ Microbiol* 46:283-285.
- 560 66. Van Domselaar GH, Stothard P, Shrivastava S, Cruz JA, Guo A, Dong X, Lu P, Szafron  
561 D, Greiner R, Wishart DS. 2005. BASys: a web server for automated bacterial genome  
562 annotation. *Nucl Acid Res* 33:W455-W459.
- 563 67. Aziz RK, Bartels D, Best AA, DeJongh M, Disz T, Edwards RA, Formsma K, Gerdes S,  
564 Glass EM, Kubal M, Meyer F, Olsen GJ, Olson R, Osterman AL, Overbeek RA, McNeil  
565 LK, Paarmann D, Paczian T, Parrello B, Pusch GD, Reich C, Stevens R, Vassieva O,  
566 Vonstein V, Wilke A, Zagnitko O. 2008. The RAST server: Rapid annotations using  
567 subsystems technology. *BMC Genomics* 9:75.
- 568 68. Goesmann A, McHardy AC, Osterman A, Hanson A, Linke B, Rückert C, Iwata-Reuyl  
569 D, Rodionov DA, Frank ED, Glass EM, Meyer F, Olsen G, Pusch GD, Chuang H-Y,  
570 Neuweiger H, Thiele I, Steiner J, Choudhuri JV, Krause L, Cohoon M, Fonstein M, Kubal

- 571 M, Diaz N, Jamshidi N, Larsen N, Vassieva O, Zagnitko O, Butler RM, Stevens R,  
572 Edwards R, Olson R, Overbeek R, Jensen R, Gerdes S, Begley T, Disz T, de Crécy-  
573 Lagard V, Portnoy V, Vonstein V, Ye Y. 2005. The subsystems approach to genome  
574 annotation and its use in the project to annotate 1000 genomes. *Nucl Acid Res* 33:5691-  
575 5702.
- 576 69. Morishima K, Tanabe M, Furumichi M, Kanehisa M, Sato Y. 2018. New approach for  
577 understanding genome variations in KEGG. *Nucl Acid Res* 47:D590-D595.
- 578 70. Pon A, Marcu A, Arndt D, Grant JR, Sajed T, Liang Y, Wishart DS. 2016. PHASTER: a  
579 better, faster version of the PHAST phage search tool. *Nucl Acid Res* 44:W16-W21.
- 580 71. Han MV, Zmasek CM. 2009. phyloXML: XML for evolutionary biology and  
581 comparative genomics. *BMC Bioinformatics* 10:356.
- 582 72. Naushad S, Barkema H, Luby C, Condas L, Nobrega D, Carson D, De Buck J. 2016.  
583 Comprehensive phylogenetic analysis of bovine non-aureus *Staphylococci* species based  
584 on whole-genome sequencing. *Front Microbiol* 7.
- 585

586 Table 1. Bacterial genomes utilized in these analyses. Genomes are separated by species  
 587 designation and host source. For each genome the isolate designation is given as well as our  
 588 abbreviation for this manuscript where indicated. The Isolate Source indicates tissue or sample  
 589 source for the bacterial isolate. Genome status indicates whether the genome is considered  
 590 finished or draft. Citation is the publication source. Further information on the genome  
 591 assemblies is provided in Table S1.

| <b>Strain Designation<br/>(Abbreviation)</b> | <b>Isolate Source</b>                                        | <b>Genome<br/>Status</b> | <b>Citation</b> |
|----------------------------------------------|--------------------------------------------------------------|--------------------------|-----------------|
| <i>S. hyicus</i> isolate from swine          |                                                              |                          |                 |
| ATCC 11249<br>(ATCC)                         | swine exudative epidermitis                                  | Finished                 | (34)            |
| <i>S. agnetis</i> isolates from chickens     |                                                              |                          |                 |
| 1416                                         | broiler femoral BCO lesion; Arkansas broiler commercial farm | Finished                 | This work       |
| 722_230714_2_5_spl<br>een (NEDS)             | broiler spleen, deceased; Denmark                            | Draft                    | (33)            |
| 722_260714_1_8_he<br>art (NDYM)              | broiler heart, deceased; Denmark                             | Draft                    |                 |
| 723_310714_2_2_spl<br>een (NEFX)             | broiler spleen, deceased; Denmark                            | Draft                    |                 |
| 908                                          | broiler femoral BCO lesion; UA Research farm                 | Finished                 | (26)            |
| <i>S. agnetis</i> isolates from bovine       |                                                              |                          |                 |
| 12B                                          | buffalo milk                                                 |                          | none            |
| 1379                                         | bovine mammary gland - milk                                  | Finished                 | This work       |
| 1383                                         | bovine mammary gland - milk                                  | Draft                    |                 |
| 1384                                         | bovine mammary gland - milk                                  | Draft                    |                 |
| 1385                                         | bovine teat skin                                             | Draft                    |                 |
| 1387                                         | bovine mammary gland – milk                                  | Draft                    |                 |
| 1389                                         | bovine inguinal skin                                         | Draft                    |                 |
| 1390                                         | bovine mammary gland – pre-partum mammary gland secretion    | Draft                    |                 |
| 1391                                         | bovine mammary gland – milk                                  | Draft                    |                 |
| 1392                                         | bovine mammary gland - milk                                  | Draft                    |                 |
| 33                                           | bovine                                                       | Draft                    |                 |
| 3682                                         | bovine milk                                                  | Draft                    |                 |
| 43                                           | bovine                                                       | Draft                    |                 |
| 59 (59a)                                     | bovine                                                       | Draft                    |                 |
| 59 (59b)                                     | bovine                                                       | Draft                    |                 |
| 6                                            | bovine                                                       | Draft                    | none            |
| CBMRN 20813338                               | bovine mammary gland - milk                                  | Draft                    | (32)            |

| <b>Strain Designation<br/>(Abbreviation)</b> | <b>Isolate Source</b>         | <b>Genome<br/>Status</b> | <b>Citation</b> |
|----------------------------------------------|-------------------------------|--------------------------|-----------------|
| (CBMRN)                                      |                               |                          |                 |
| DSM_23656                                    | bovine mastitic milk          | Draft                    | none            |
| SNUC_1371                                    | Holstein clinical mastitis    | Draft                    | (72)            |
| SNUC_1383                                    | Holstein clinical mastitis    | Draft                    |                 |
| SNUC_2265                                    | Holstein subclinical mastitis | Draft                    |                 |
| SNUC_2493                                    | Holstein subclinical mastitis | Draft                    |                 |
| SNUC_3261                                    | Holstein subclinical mastitis | Draft                    |                 |
| SNUC_3610                                    | Holstein subclinical mastitis | Draft                    |                 |
| SNUC_3836                                    | Holstein subclinical mastitis | Draft                    |                 |
| SNUC_4051                                    | Holstein subclinical mastitis | Draft                    |                 |
| SNUC_4805                                    | Holstein subclinical mastitis | Draft                    |                 |
| SNUC_5151                                    | Holstein subclinical mastitis | Draft                    |                 |
| SNUC_5631                                    | Holstein subclinical mastitis | Draft                    |                 |
| SNUC_719                                     | Holstein subclinical mastitis | Draft                    |                 |
| SNUC_725                                     | Holstein subclinical mastitis | Draft                    |                 |

592

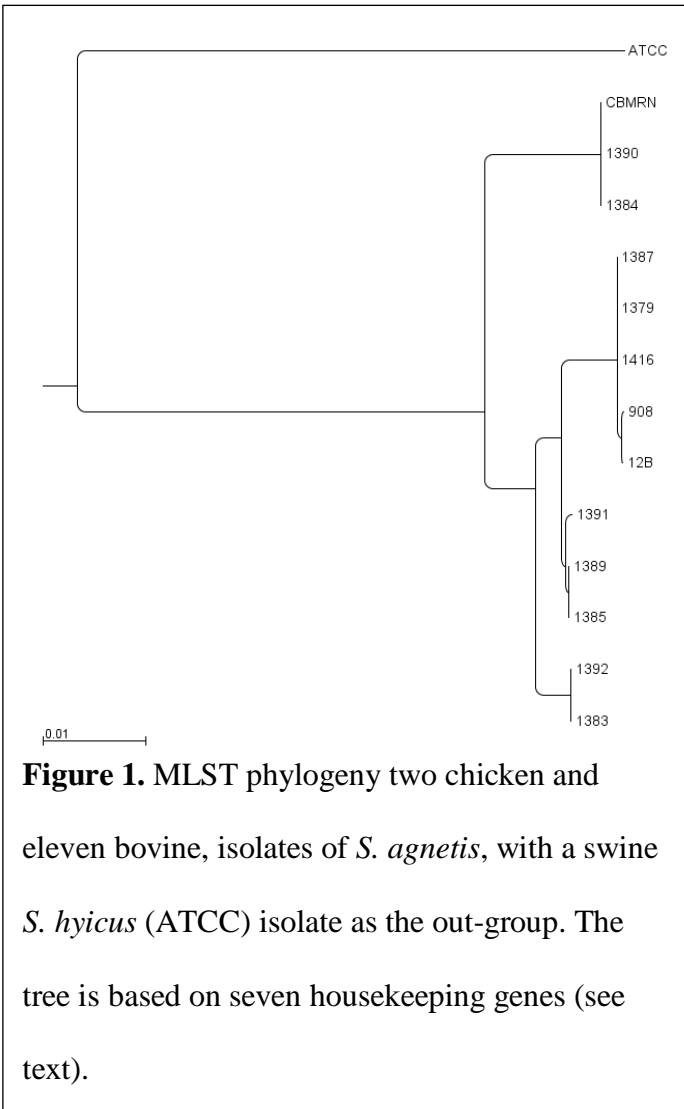

593

594

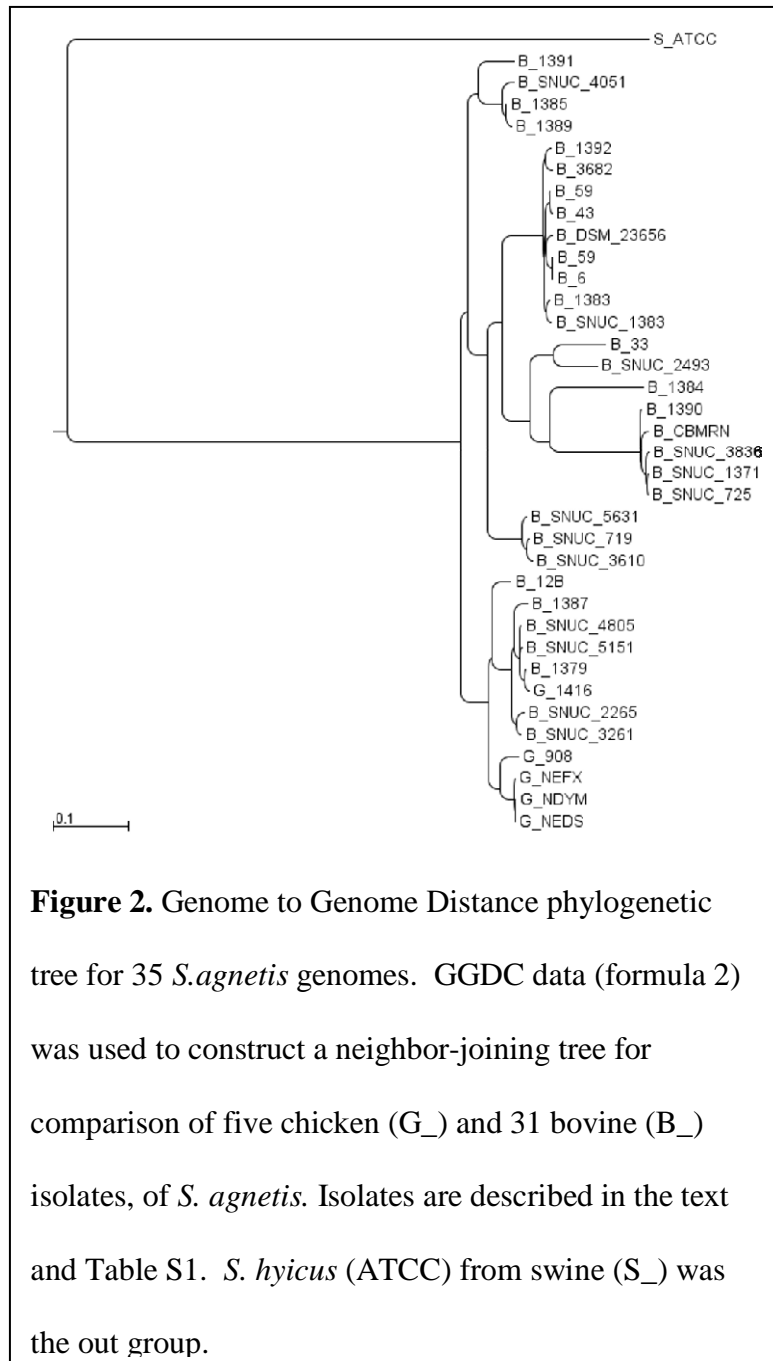

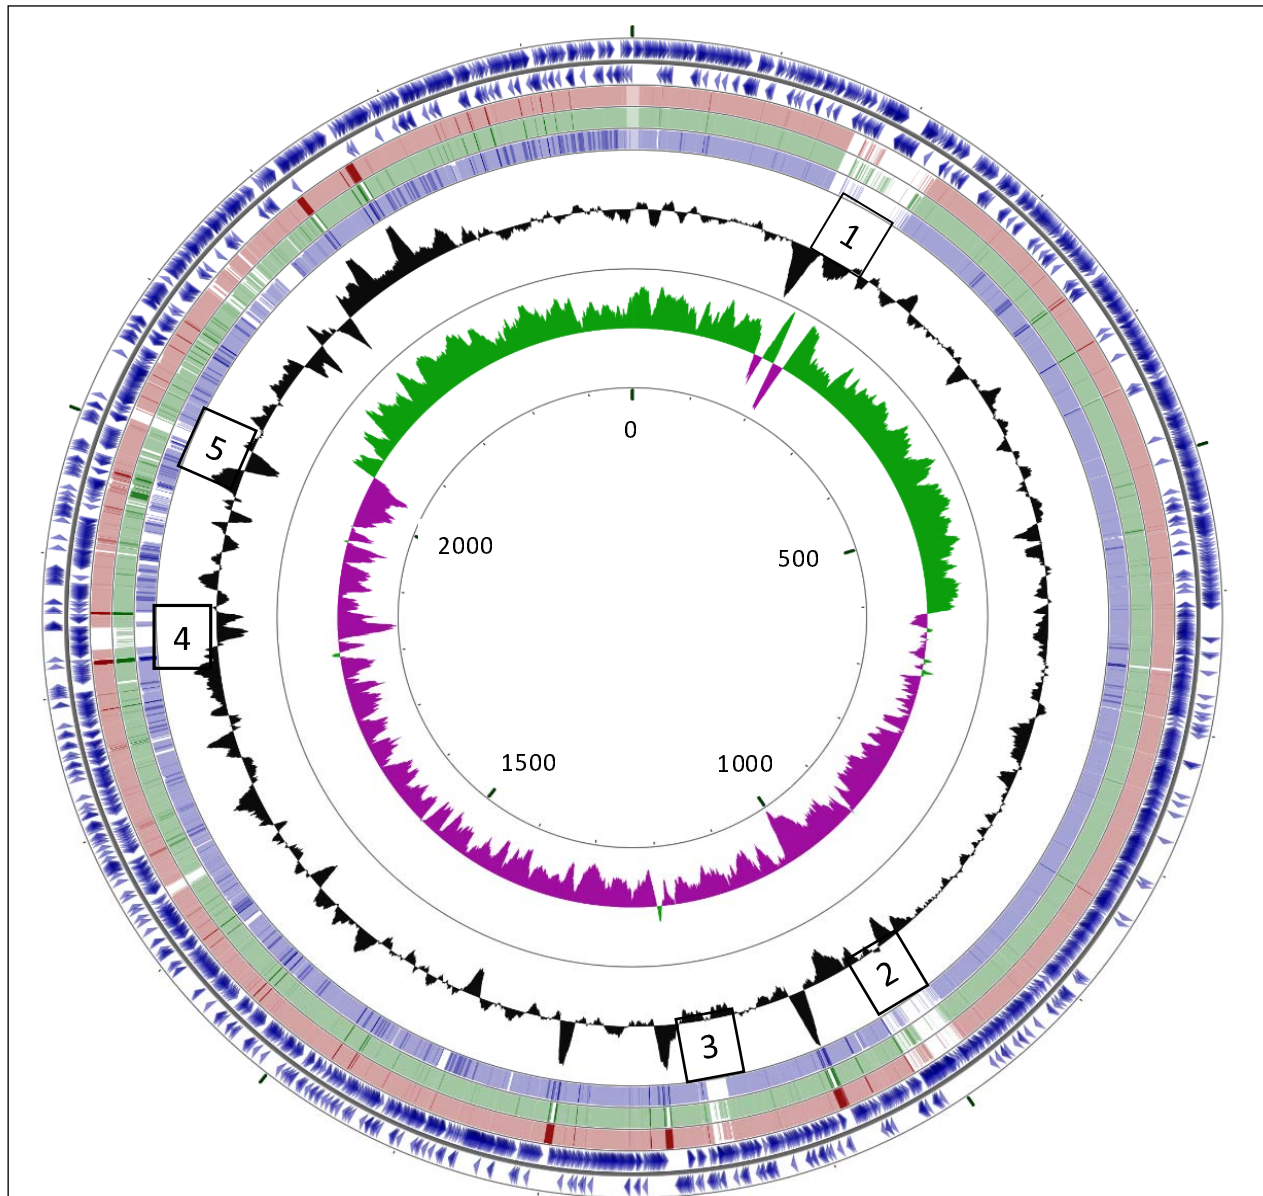

**Figure 3. CGView blastn comparison of *S. agnetis* 908, 1379, 1387 and 1385 genomes.**

The *S. agnetis* 908 2.4 Mbp chromosome was the reference for blastn comparisons with three *S. agnetis* cattle isolates, 1379 (pink), 1387 (green), and 1385 (blue). Parameters were Query size = 10000, overlap 5000, expect=0.0001. Intensity of the color is indicative of the blastn score. The outer two rings show the annotated genes for isolate *S. agnetis* 908. The innermost ring indicates Mbp, the second most inner ring is the GC skew (magenta GC skew-; green GC skew+), and the third most inner ring plots GC content. The Numbered boxes indicate the locations of the 5 gene islands discussed in the text and are not scaled to the size of the island.

595



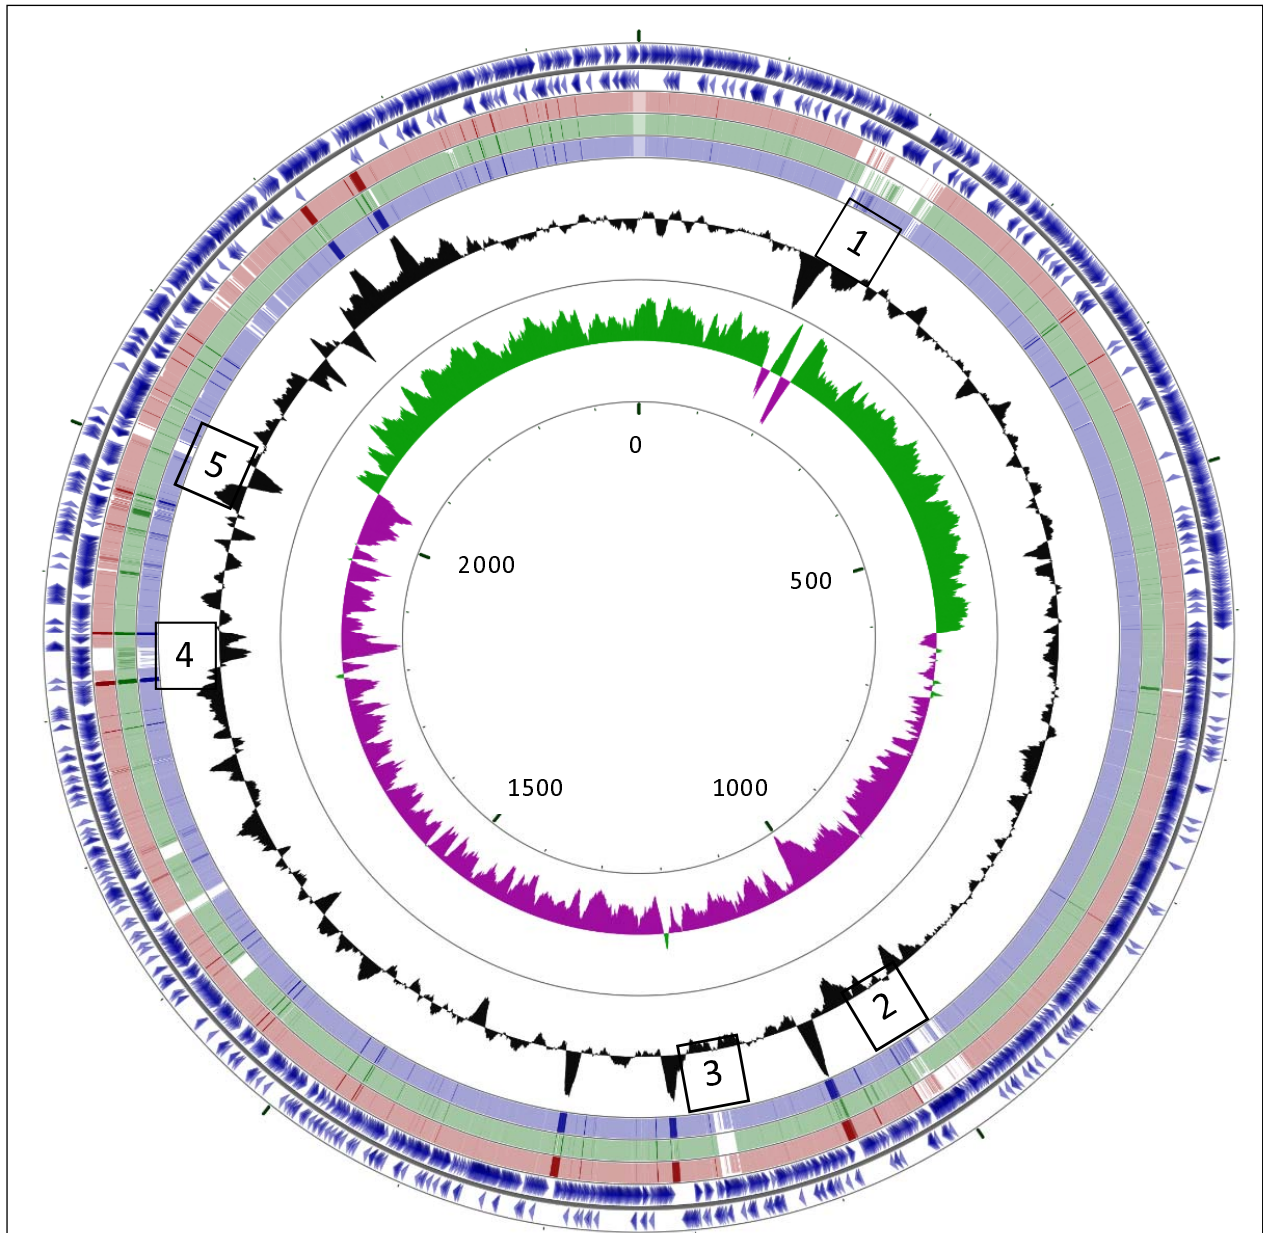

**Figure 4. CGView blast comparison of *S. agnetis* 908, 1379, NEDS, and 1416 genomes.**

The *S. agnetis* 908 2.4 Mbp chromosome was the reference for blastn comparisons with *S. agnetis* cattle isolate 1379 (pink), and chicken isolates; NEDS (green), and 1416 (blue). All other details are as in Figure 3 legend.



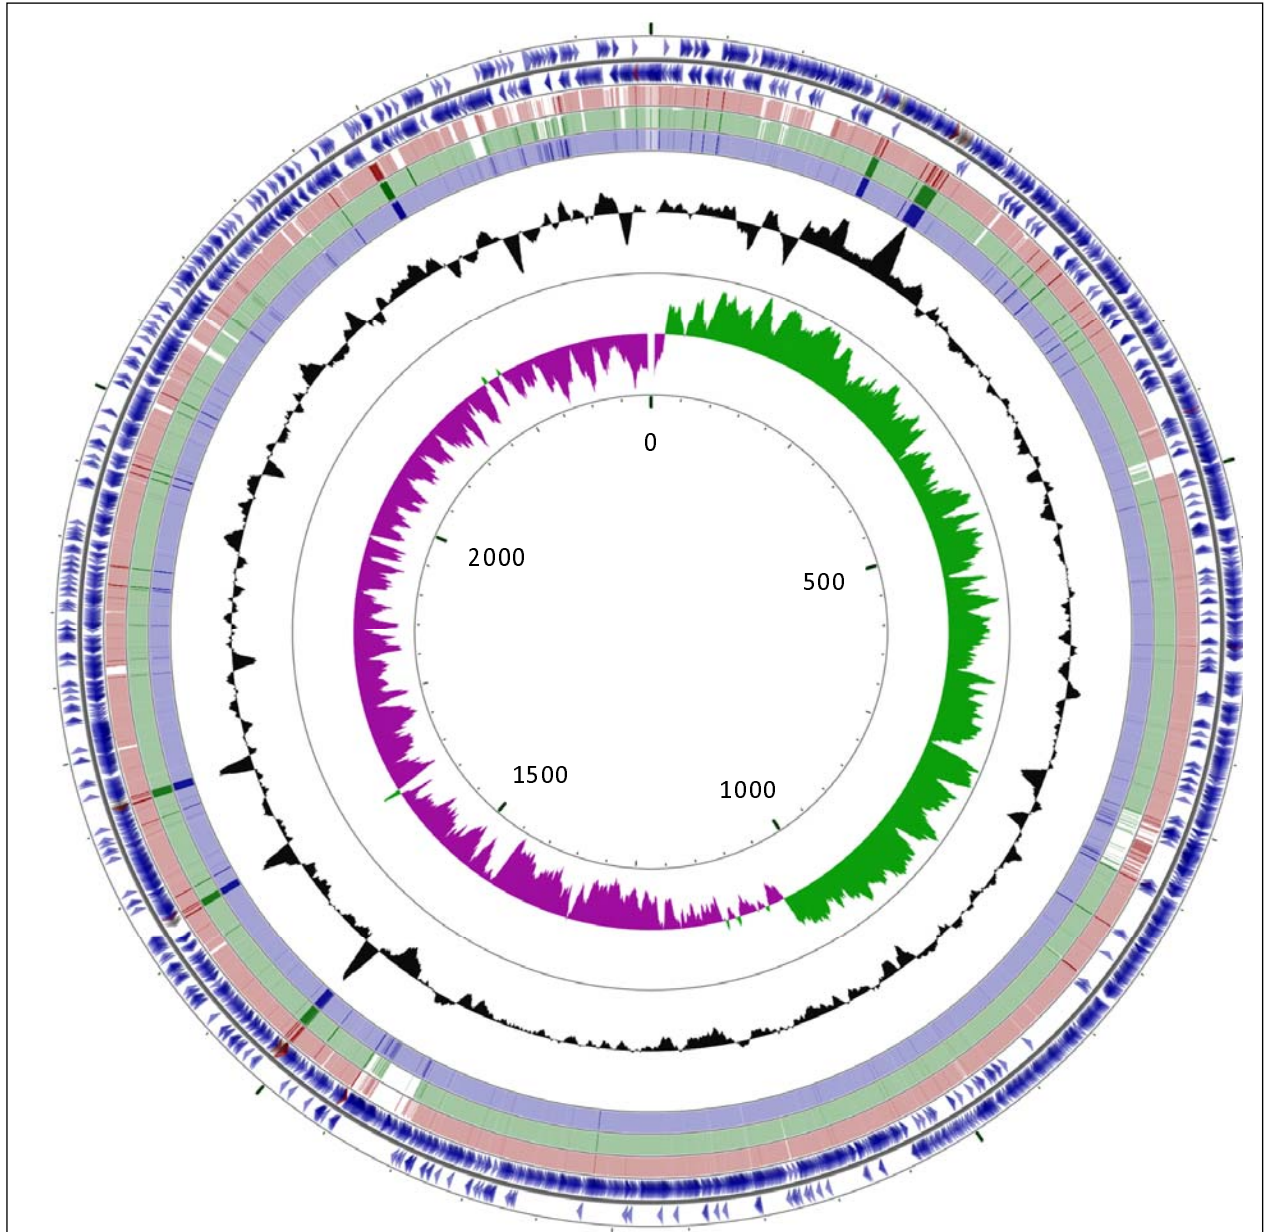

**Figure 5. CGView blastn comparison of *S. agnetis* 1379, CBMRN, 908 and 1416**

**genomes.** The *S. agnetis* 1379 2.4 Mbp chromosome was the reference for blastn comparisons with *S. agnetis* cattle isolate CBMRN (pink), and chicken isolates; 908 (green), and 1416 (blue). All other details are as in Figure 3 legend.
